# Supplementary material for: Three chiral one-dimensional lanthanide–ditoluoyl-tartrate bifunctional polymers exhibiting luminescence and magnetic behaviors
Source: Royal Society of Chemistry journal article supplement (doi:10.1039/c9ra06920h), 2019-01-01
Supplement: c9ra06920h1.pdf [file c9ra06920h1.pdf]

## Three chiral one-dimensional lanthanide–ditoluoyl-tartrate bifunctional polymers exhibiting luminescence and magnetic behaviors

*Mei-rong Han<sup>a†</sup>, Han-tao Zhang<sup>a†</sup>, Jia-nan Wang<sup>a</sup>, Si-si Feng<sup>\*a,b</sup>, Li-ping Lu<sup>\*a,b</sup>*

<sup>a</sup>Institute of Molecular Science, Key Laboratory of Chemical Biology and Molecular Engineering of the Education Ministry, Shanxi University, Taiyuan, Shanxi 030006, P. R. China.

<sup>b</sup>Key Laboratory of Materials for Energy Conversion and Storage of Shanxi Province; Shanxi University, Taiyuan, Shanxi, 030006, P. R. China.

**Table S1.** Selected bond lengths (Å), Ln...Ln distances (Å) and angles (°) for **1–3**

| 1                                       |           |                                         |           |                                         |            |
|-----------------------------------------|-----------|-----------------------------------------|-----------|-----------------------------------------|------------|
| Tb1—O4 <sup>i</sup>                     | 2.302 (6) | Tb1—O1 <sup>iv</sup>                    | 2.347 (5) | Tb1—O9 <sup>v</sup>                     | 2.554 (8)  |
| Tb1—O4 <sup>ii</sup>                    | 2.302 (6) | Tb1—O1 <sup>v</sup>                     | 2.347 (5) | Tb1—O9                                  | 2.554 (8)  |
| Tb1—O4 <sup>iii</sup>                   | 2.302 (6) | Tb1—O1                                  | 2.347 (5) | Tb1—O9 <sup>iv</sup>                    | 2.554 (8)  |
| Tb1...Tb1                               | 7.6178(5) |                                         |           |                                         |            |
| O4 <sup>i</sup> —Tb1—O4 <sup>ii</sup>   | 80.3 (2)  | O4 <sup>iii</sup> —Tb1—O1 <sup>iv</sup> | 85.2 (2)  | O4 <sup>i</sup> —Tb1—O1                 | 85.3 (2)   |
| O4 <sup>i</sup> —Tb1—O4 <sup>iii</sup>  | 80.3 (2)  | O4 <sup>i</sup> —Tb1—O1 <sup>v</sup>    | 140.2 (2) | O4 <sup>ii</sup> —Tb1—O1                | 133.3 (2)  |
| O4 <sup>ii</sup> —Tb1—O4 <sup>iii</sup> | 80.3 (2)  | O4 <sup>ii</sup> —Tb1—O1 <sup>v</sup>   | 85.3 (2)  | O4 <sup>iii</sup> —Tb1—O1               | 140.2 (2)  |
| O4 <sup>i</sup> —Tb1—O1 <sup>iv</sup>   | 133.3 (2) | O4 <sup>iii</sup> —Tb1—O1 <sup>v</sup>  | 133.3 (2) | O1 <sup>iv</sup> —Tb1—O1                | 78.2 (2)   |
| O4 <sup>ii</sup> —Tb1—O1 <sup>iv</sup>  | 140.2 (2) | O1 <sup>iv</sup> —Tb1—O1 <sup>v</sup>   | 78.2 (2)  | O1 <sup>v</sup> —Tb1—O1                 | 78.2 (2)   |
| O4 <sup>i</sup> —Tb1—O9 <sup>v</sup>    | 69.7 (3)  | O4 <sup>i</sup> —Tb1—O9                 | 140.3 (3) | O9 <sup>v</sup> —Tb1—O9                 | 119.86 (3) |
| O4 <sup>ii</sup> —Tb1—O9 <sup>v</sup>   | 140.3 (3) | O4 <sup>ii</sup> —Tb1—O9                | 69.7 (3)  | O4 <sup>i</sup> —Tb1—O9 <sup>iv</sup>   | 69.7 (3)   |
| O4 <sup>iii</sup> —Tb1—O9 <sup>v</sup>  | 69.7 (3)  | O4 <sup>iii</sup> —Tb1—O9               | 69.7 (3)  | O4 <sup>ii</sup> —Tb1—O9 <sup>iv</sup>  | 69.7 (3)   |
| O1 <sup>iv</sup> —Tb1—O9 <sup>v</sup>   | 63.7 (2)  | O1 <sup>iv</sup> —Tb1—O9                | 70.6 (2)  | O4 <sup>iii</sup> —Tb1—O9 <sup>iv</sup> | 140.3 (3)  |
| O1 <sup>v</sup> —Tb1—O9 <sup>v</sup>    | 134.4 (2) | O1 <sup>v</sup> —Tb1—O9                 | 63.7 (2)  | O1 <sup>iv</sup> —Tb1—O9 <sup>iv</sup>  | 134.4 (2)  |

|                         |          |                                       |            |                                       |            |
|-------------------------|----------|---------------------------------------|------------|---------------------------------------|------------|
| O1—Tb1—O9 <sup>v</sup>  | 70.6 (3) | O1—Tb1—O9                             | 134.4 (2)  | O1 <sup>v</sup> —Tb1—O9 <sup>iv</sup> | 70.6 (3)   |
| O1—Tb1—O9 <sup>iv</sup> | 63.7 (2) | O9 <sup>v</sup> —Tb1—O9 <sup>iv</sup> | 119.86 (3) | O9—Tb1—O9 <sup>iv</sup>               | 119.86 (3) |

Symmetry codes: (i)  $x, y, z - 1$ ; (ii)  $-y + 1, x - y + 1, z - 1$ ; (iii)  $-x + y, -x + 1, z - 1$ ; (iv)  $-x + y, -x + 1, z$ ; (v)  $-y + 1, x - y + 1, z$ ; (vi)  $x, y, z + 1$ .

**2**

|                                         |            |                                        |                |                                        |                |
|-----------------------------------------|------------|----------------------------------------|----------------|----------------------------------------|----------------|
| Dy1—O4 <sup>i</sup>                     | 2.304 (5)  | Dy1—O1 <sup>iv</sup>                   | 2.355 (4)      | Dy1—O9 <sup>v</sup>                    | 2.576 (5)      |
| Dy1—O4 <sup>ii</sup>                    | 2.304 (5)  | Dy1—O1                                 | 2.355 (4)      | Dy1—O9 <sup>iv</sup>                   | 2.576 (5)      |
| Dy1—O4 <sup>iii</sup>                   | 2.304 (5)  | Dy1—O1 <sup>v</sup>                    | 2.355 (4)      | Dy1—O9                                 | 2.576 (5)      |
| Dy1...Dy1                               | 7.6520 (5) |                                        |                |                                        |                |
| O4 <sup>i</sup> —Dy1—O4 <sup>iii</sup>  | 79.20 (1)  | O4 <sup>iii</sup> —Dy1—O1              | 86.85 (1)      | O4 <sup>i</sup> —Dy1—O9 <sup>v</sup>   | 139.64 (1)     |
| O4 <sup>ii</sup> —Dy1—O4 <sup>iii</sup> | 79.20 (1)  | O1 <sup>iv</sup> —Dy1—O1               | 76.83 (1)      | O4 <sup>ii</sup> —Dy1—O9 <sup>v</sup>  | 70.32 (1)      |
| O4 <sup>i</sup> —Dy1—O1 <sup>iv</sup>   | 134.36 (1) | O4 <sup>i</sup> —Dy1—O1 <sup>v</sup>   | 86.84 (1)      | O4 <sup>iii</sup> —Dy1—O9 <sup>v</sup> | 69.77 (1)      |
| O4 <sup>ii</sup> —Dy1—O1 <sup>iv</sup>  | 86.85 (1)  | O4 <sup>ii</sup> —Dy1—O1 <sup>v</sup>  | 140.38 (1)     | O1 <sup>iv</sup> —Dy1—O9 <sup>v</sup>  | 70.62 (1)      |
| O4 <sup>iii</sup> —Dy1—O1 <sup>iv</sup> | 140.38 (1) | O4 <sup>iii</sup> —Dy1—O1 <sup>v</sup> | 134.36 (1)     | O1—Dy1—O9 <sup>v</sup>                 | 64.08 (1)      |
| O4 <sup>i</sup> —Dy1—O1                 | 140.38 (1) | O1 <sup>iv</sup> —Dy1—O1 <sup>v</sup>  | 76.83 (1)      | O1 <sup>v</sup> —Dy1—O9 <sup>v</sup>   | 133.40 (1)     |
| O4 <sup>i</sup> —Dy1—O9 <sup>iv</sup>   | 69.77 (1)  | O9 <sup>v</sup> —Dy1—O9 <sup>iv</sup>  | 119.848<br>(1) | O1 <sup>v</sup> —Dy1—O9                | 70.62 (1)      |
| O4 <sup>ii</sup> —Dy1—O9 <sup>iv</sup>  | 139.64 (1) | O4 <sup>i</sup> —Dy1—O9                | 70.32 (1)      | O9 <sup>v</sup> —Dy1—O9                | 119.850<br>(1) |
| O4 <sup>iii</sup> —Dy1—O9 <sup>iv</sup> | 70.32 (1)  | O4 <sup>ii</sup> —Dy1—O9               | 69.77 (1)      | O9 <sup>iv</sup> —Dy1—O9               | 119.847<br>(1) |
| O1 <sup>iv</sup> —Dy1—O9 <sup>iv</sup>  | 133.40 (1) | O4 <sup>iii</sup> —Dy1—O9              | 139.64 (1)     | O1 <sup>v</sup> —Dy1—O9 <sup>iv</sup>  | 64.08 (1)      |
| O1—Dy1—O9 <sup>iv</sup>                 | 70.62 (1)  | O1 <sup>iv</sup> —Dy1—O9               | 64.08 (1)      | O1—Dy1—O9                              | 133.40 (1)     |
| O4 <sup>i</sup> —Dy1—O4 <sup>ii</sup>   | 79.20 (1)  | O4 <sup>ii</sup> —Dy1—O1               | 134.36 (1)     | O1—Dy1—O1 <sup>v</sup>                 | 76.83 (1)      |

Symmetry codes : (i)  $-x + y, -x, z - 1$ ; (ii)  $-y, x - y, z - 1$ ; (iii)  $x, y, z - 1$ ; (iv)  $-y, x - y, z$ ; (v)  $-x + y, -x, z$ ; (vi)  $x, y, z + 1$ .

|                                         |           |                                         |               |                                         |               |
|-----------------------------------------|-----------|-----------------------------------------|---------------|-----------------------------------------|---------------|
| Ho1—O4 <sup>i</sup>                     | 2.297 (8) | Ho1—O1                                  | 2.329 (9)     | Ho1—O9 <sup>iv</sup>                    | 2.554 (7)     |
| Ho1—O4 <sup>ii</sup>                    | 2.297 (8) | Ho1—O1 <sup>iv</sup>                    | 2.329 (9)     | Ho1—O9                                  | 2.554 (7)     |
| Ho1—O4 <sup>iii</sup>                   | 2.297 (8) | Ho1—O1 <sup>v</sup>                     | 2.329 (9)     | Ho1—O9 <sup>v</sup>                     | 2.554 (7)     |
| Ho1...Ho1                               | 7.6372(5) |                                         |               |                                         |               |
| O4 <sup>i</sup> —Ho1—O4 <sup>ii</sup>   | 79.6 (3)  | O4 <sup>i</sup> —Ho1—O1 <sup>iv</sup>   | 134.4 (4)     | O4 <sup>iii</sup> —Ho1—O1 <sup>v</sup>  | 134.4 (4)     |
| O4 <sup>i</sup> —Ho1—O4 <sup>iii</sup>  | 79.6 (3)  | O4 <sup>ii</sup> —Ho1—O1 <sup>iv</sup>  | 86.6 (3)      | O1—Ho1—O1 <sup>v</sup>                  | 76.9 (3)      |
| O4 <sup>ii</sup> —Ho1—O4 <sup>iii</sup> | 79.6 (3)  | O4 <sup>iii</sup> —Ho1—O1 <sup>iv</sup> | 140.1 (4)     | O1 <sup>iv</sup> —Ho1—O1 <sup>v</sup>   | 76.9 (3)      |
| O4 <sup>i</sup> —Ho1—O1                 | 140.1 (4) | O1—Ho1—O1 <sup>iv</sup>                 | 76.9 (3)      | O4 <sup>i</sup> —Ho1—O9 <sup>iv</sup>   | 70.1 (4)      |
| O4 <sup>ii</sup> —Ho1—O1                | 134.4 (4) | O4 <sup>i</sup> —Ho1—O1 <sup>v</sup>    | 86.6 (3)      | O4 <sup>ii</sup> —Ho1—O9 <sup>iv</sup>  | 140.3 (3)     |
| O4 <sup>iii</sup> —Ho1—O1               | 86.6 (3)  | O4 <sup>ii</sup> —Ho1—O1 <sup>v</sup>   | 140.1 (4)     | O4 <sup>iii</sup> —Ho1—O9 <sup>iv</sup> | 70.4 (3)      |
| O1—Ho1—O9 <sup>iv</sup>                 | 70.0 (3)  | O4 <sup>iii</sup> —Ho1—O9               | 140.3 (3)     | O4 <sup>i</sup> —Ho1—O9 <sup>v</sup>    | 140.3 (3)     |
| O1 <sup>iv</sup> —Ho1—O9 <sup>iv</sup>  | 133.0 (3) | O1—Ho1—O9                               | 133.0 (3)     | O4 <sup>ii</sup> —Ho1—O9 <sup>v</sup>   | 70.4 (3)      |
| O1 <sup>v</sup> —Ho1—O9 <sup>iv</sup>   | 64.0 (4)  | O1 <sup>iv</sup> —Ho1—O9                | 64.0 (4)      | O4 <sup>iii</sup> —Ho1—O9 <sup>v</sup>  | 70.1 (4)      |
| O4 <sup>i</sup> —Ho1—O9                 | 70.4 (3)  | O1 <sup>v</sup> —Ho1—O9                 | 70.0 (3)      | O1—Ho1—O9 <sup>v</sup>                  | 64.0 (4)      |
| O4 <sup>ii</sup> —Ho1—O9                | 70.1 (4)  | O9 <sup>iv</sup> —Ho1—O9                | 119.78<br>(4) | O1 <sup>iv</sup> —Ho1—O9 <sup>v</sup>   | 70.0 (3)      |
| O1 <sup>v</sup> —Ho1—O9 <sup>v</sup>    | 133.0 (3) | O9 <sup>iv</sup> —Ho1—O9 <sup>v</sup>   | 119.79<br>(4) | O9—Ho1—O9 <sup>v</sup>                  | 119.78<br>(3) |

Symmetry codes: (i)  $-x + y, -x, z - 1$ ; (ii)  $-y, x - y, z - 1$ ; (iii)  $x, y, z - 1$ ; (iv)  $-y, x - y, z$ ; (v)  $-x + y, -x, z$ ; (vi)  $x, y, z + 1$ .

**Table S2.** Hydrogen-bond geometry (Å, °) for **1**

| D—H...A                                                   | D—H  | H...A | D...A      | D—H...A |
|-----------------------------------------------------------|------|-------|------------|---------|
| O9—H9...O6 <sup>i</sup>                                   | 0.93 | 2.08  | 2.960 (14) | 157     |
| O2—H2...O3 <sup>ii</sup>                                  | 0.83 | 1.66  | 2.471 (9)  | 166     |
| C18 <sup>vi</sup> —H18 <sup>vi</sup> ...Cg <sup>iii</sup> | 0.93 | 2.55  | 3.419(7)   | 155     |

Symmetry codes: (i)  $-x + y, -x + 1, z$ ; (ii)  $x, y, z - 1$ ; (iii)  $x, y, z - 1$ ; (vi)  $x, y, z - 3$ .

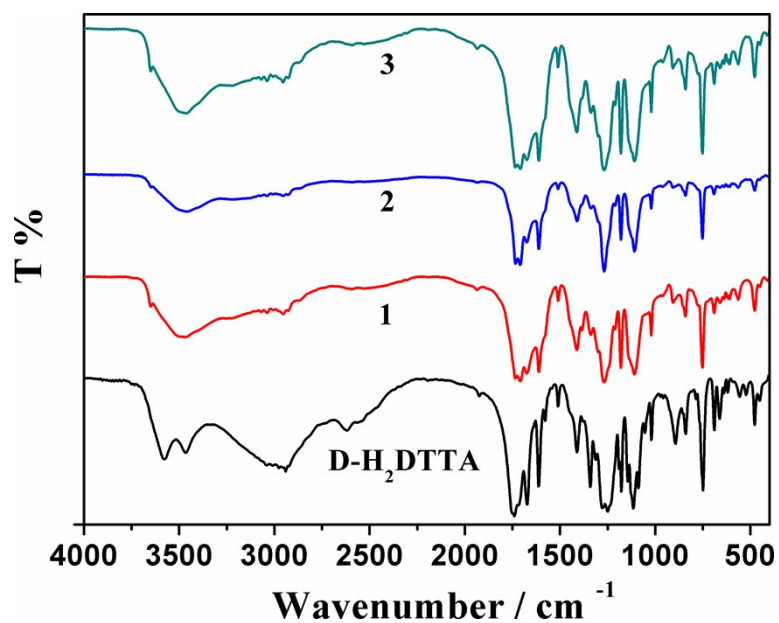

**Figure S1.** IR spectra for D-H<sub>2</sub>DTTA and 1–3 (KBr, cm<sup>-1</sup>)

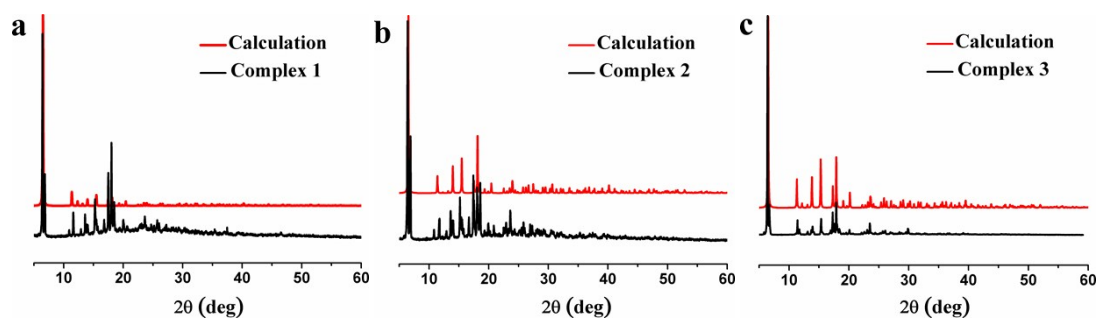

**Figure S2.** The PXRD patterns of complexes 1–3 (calculation and experiment) at room temperature.

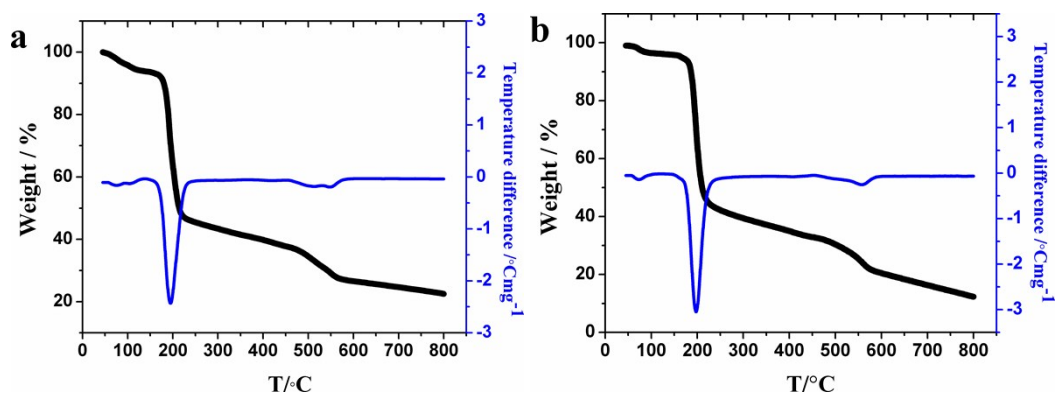

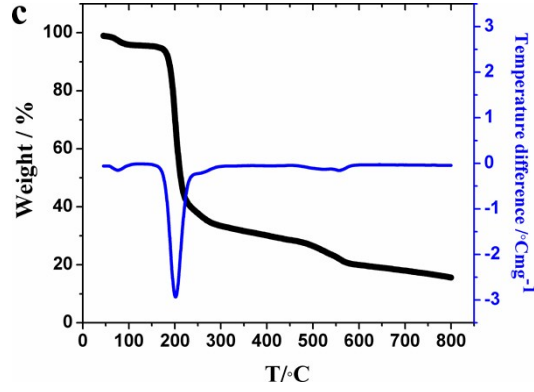

Figure S3. TGA plots of complexes 1–3.

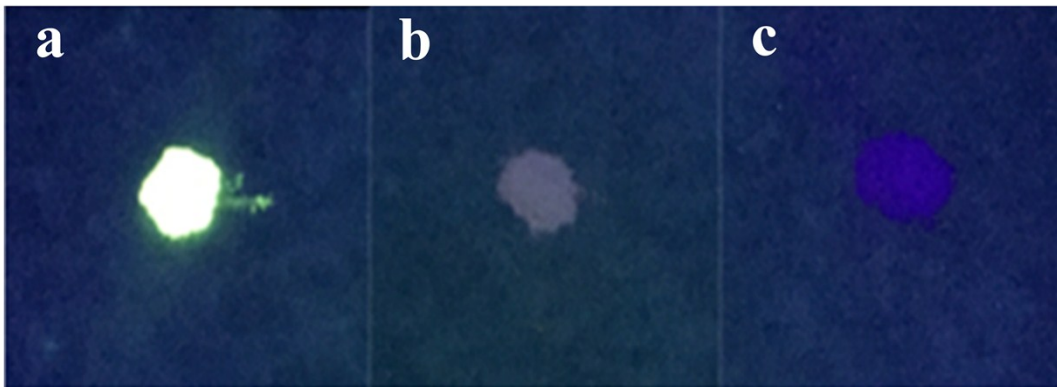

Figure S4. Digital photograph of complexes 1–3 under irradiation of UV light.

**Scheme S1.** Mathematical expressions describing the temperature dependence of the magnetic susceptibility due to the depopulation of the excited Stark levels.

$$\chi_{\text{Tb}} = \frac{\text{Ng}^2 \beta^2}{\text{kT}} \frac{2e^{-\Delta/\text{kT}} + 4e^{-2\Delta/\text{kT}} + 18e^{-9\Delta/\text{kT}} + 32e^{-16\Delta/\text{kT}} + 50e^{-25\Delta/\text{kT}} + 72e^{-36\Delta/\text{kT}}}{1 + 2e^{-\Delta/\text{kT}} + 2e^{-2\Delta/\text{kT}} + 2e^{-9\Delta/\text{kT}} + 2e^{-16\Delta/\text{kT}} + 2e^{-25\Delta/\text{kT}} + 2e^{-36\Delta/\text{kT}}}$$

$$\chi_{\text{Dy}} = \frac{\text{Ng}^2 \beta^2}{\text{kT}} \frac{0.5e^{-0.25\Delta/\text{kT}} + 4.5e^{-2.25\Delta/\text{kT}} + 12.5e^{-6.25\Delta/\text{kT}} + 24.5e^{-12.25\Delta/\text{kT}} + 40.5e^{-20.25\Delta/\text{kT}} + 60.5e^{-30.25\Delta/\text{kT}} + 84.5e^{-42.25\Delta/\text{kT}} + 112.5e^{-56.25\Delta/\text{kT}}}{1 + 2e^{-0.25\Delta/\text{kT}} + 2e^{-2.25\Delta/\text{kT}} + 2e^{-6.25\Delta/\text{kT}} + 2e^{-12.25\Delta/\text{kT}} + 2e^{-20.25\Delta/\text{kT}} + 2e^{-30.25\Delta/\text{kT}} + 2e^{-42.25\Delta/\text{kT}} + 2e^{-56.25\Delta/\text{kT}}}$$

$$\chi_{\text{Ho}} = \frac{\text{Ng}^2 \beta^2}{\text{kT}} \frac{2e^{-\Delta/\text{kT}} + 8e^{-4\Delta/\text{kT}} + 18e^{-9\Delta/\text{kT}} + 32e^{-16\Delta/\text{kT}} + 50e^{-25\Delta/\text{kT}} + 72e^{-36\Delta/\text{kT}} + 98e^{-49\Delta/\text{kT}} + 128e^{-64\Delta/\text{kT}}}{1 + 2e^{-\Delta/\text{kT}} + 2e^{-4\Delta/\text{kT}} + 2e^{-9\Delta/\text{kT}} + 2e^{-16\Delta/\text{kT}} + 2e^{-25\Delta/\text{kT}} + 2e^{-36\Delta/\text{kT}} + 2e^{-49\Delta/\text{kT}} + 2e^{-64\Delta/\text{kT}}}$$

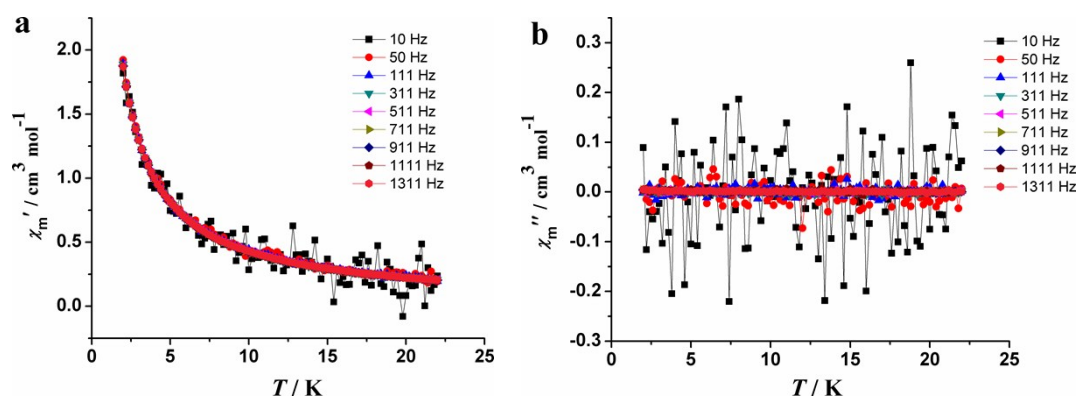

**Figure S5.** (a) In-phase  $ac$  magnetic susceptibility ( $\chi_m'$ ) and (b) out-of-phase  $ac$  magnetic susceptibility ( $\chi_m''$ ) for **1** at temperatures from 2 to 22 K.
